# Supplementary material for: Multidecadal increases in global tropospheric ozone derived from ozonesonde and surface site observations: can models reproduce ozone trends?
Source: Copernicus journal article supplement (doi:10.5194/acp-22-14751-2022), 2022-11-21
Supplement: Supplementary file 1 [file acp-22-14751-2022-supplement.pdf]

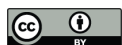

*Supplement of*

## **Multidecadal increases in global tropospheric ozone derived from ozonesonde and surface site observations: can models reproduce ozone trends?**

**Amy Christiansen et al.**

*Correspondence to:* Lu Hu ([lu.hu@mso.umt.edu](mailto:lu.hu@mso.umt.edu)) and Amy Christiansen ([achristiansen@umkc.edu](mailto:achristiansen@umkc.edu))

The copyright of individual parts of the supplement might differ from the article licence.

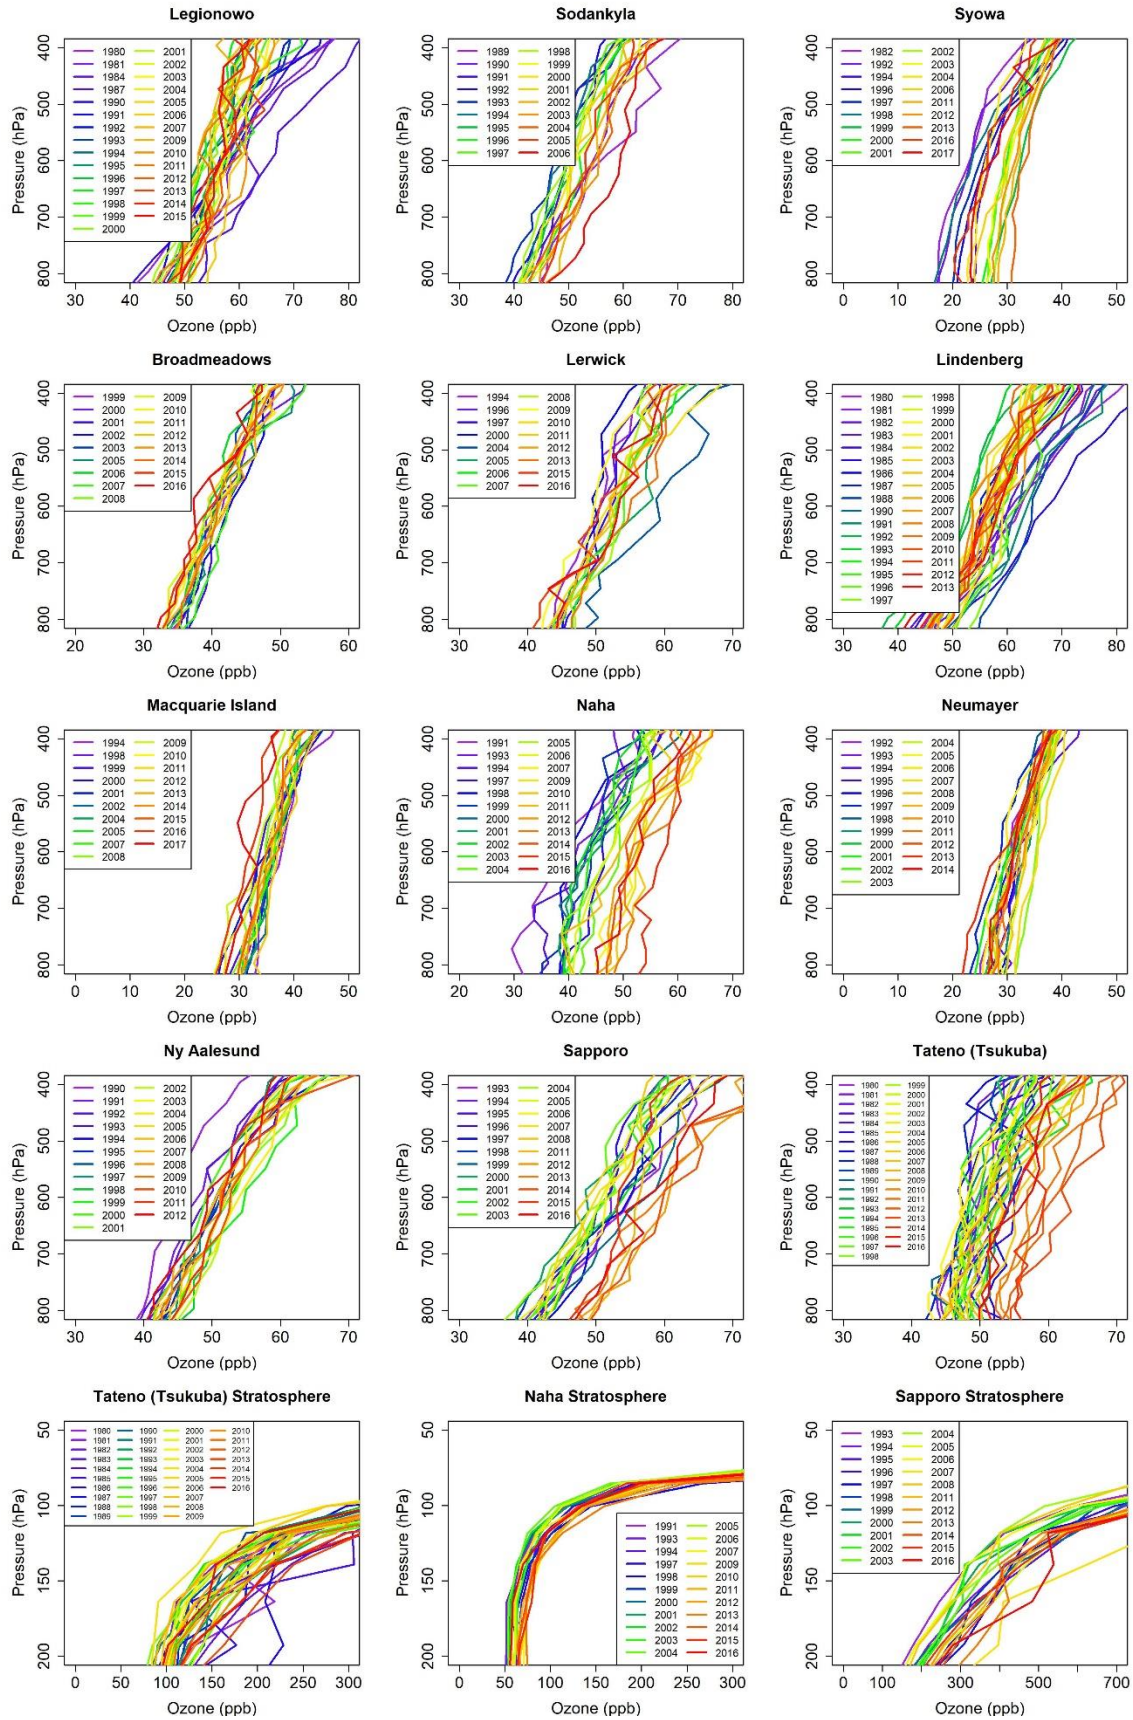

**Figure S1. Annual median ozone profiles for ozonesonde data from the 12 non-homogenized sites from 1990-2017. No step changes are apparent in the data, with the exception of the Japanese sites (Naha, Sapporo, Tateno (Tsukuba)). These step changes are not apparent in the stratosphere.**

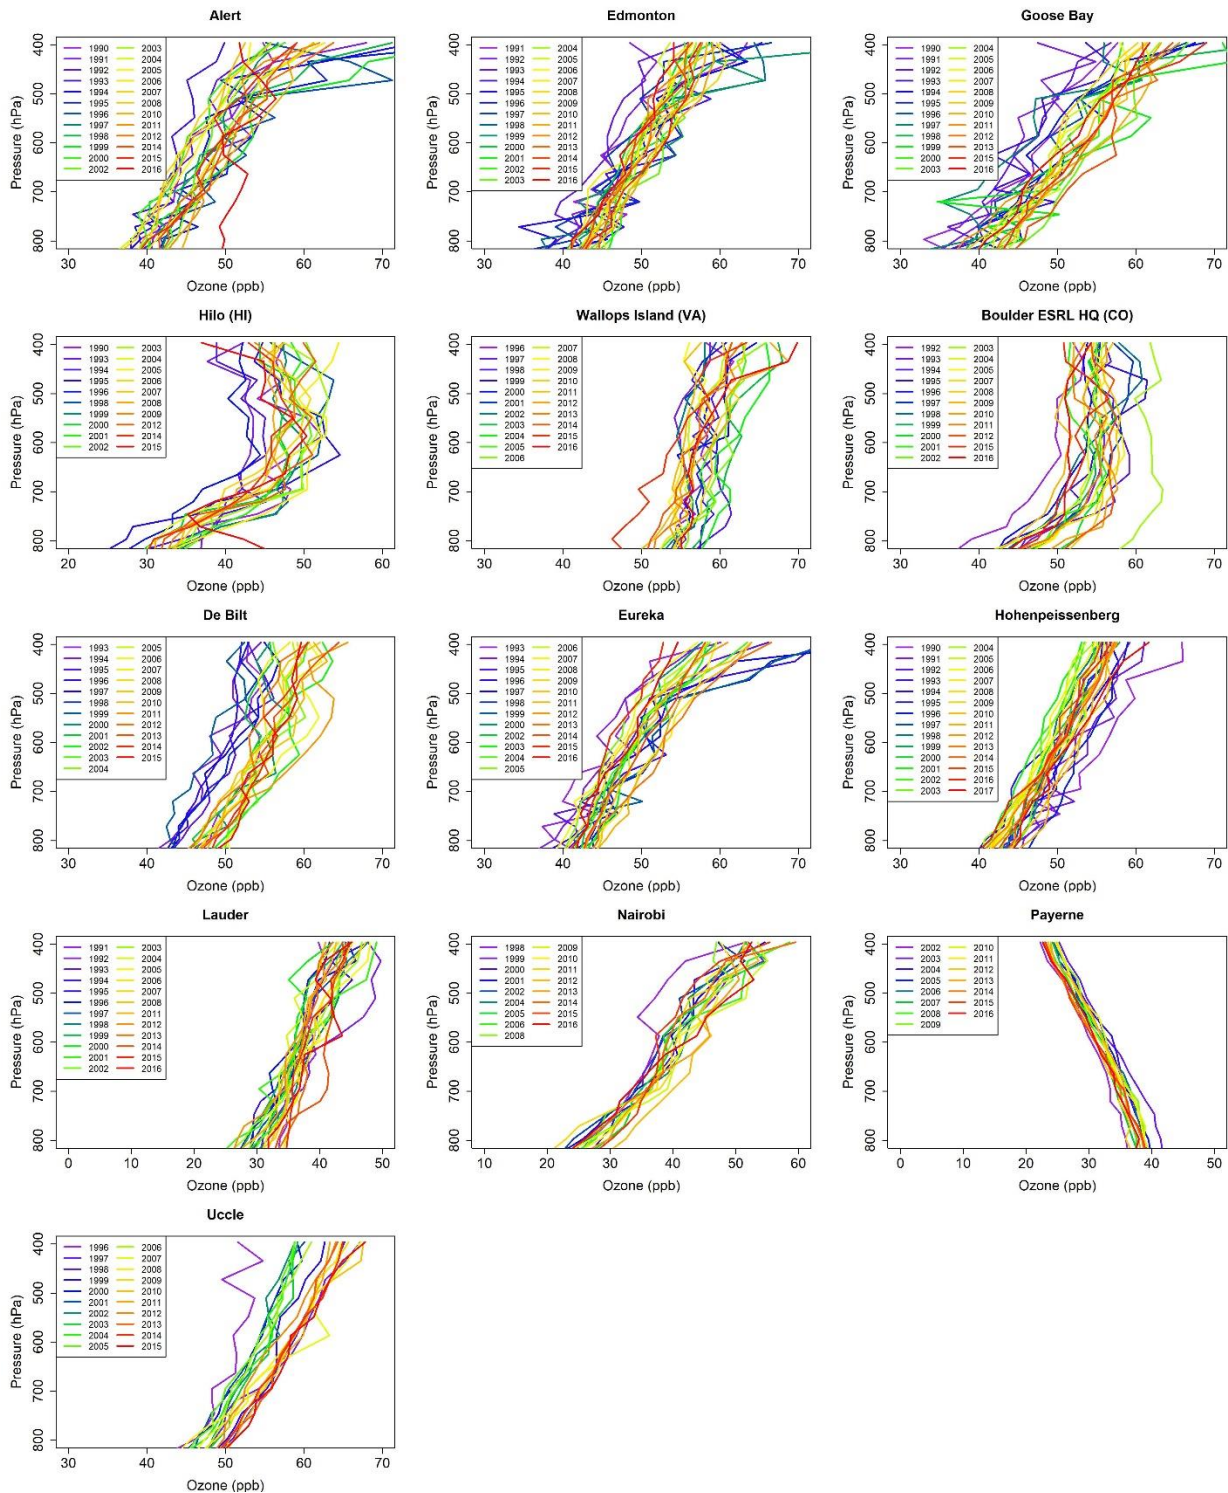

**Figure S2. Annual median ozone profiles for ozonesonde data from the 13 homogenized sites from 1990-2017. No step changes are apparent in the data.**

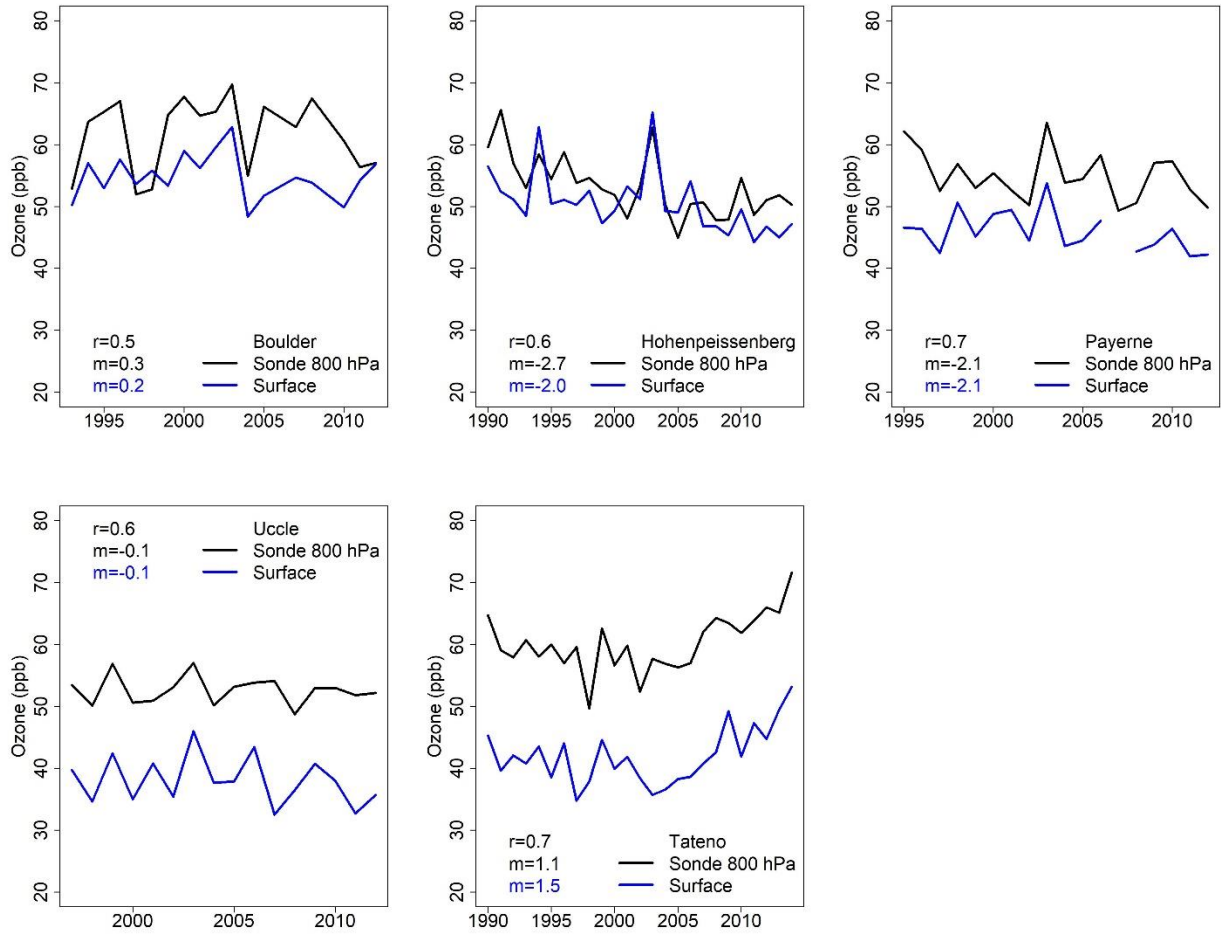

**Figure S3.** Trends in mean summertime ozone between the lowest sonde pressure (800 hPa, black line) and co-located surface sites (blue line). Correlations ( $r$ ) and slopes ( $m$ ) showing the trend over time are shown in each panel.

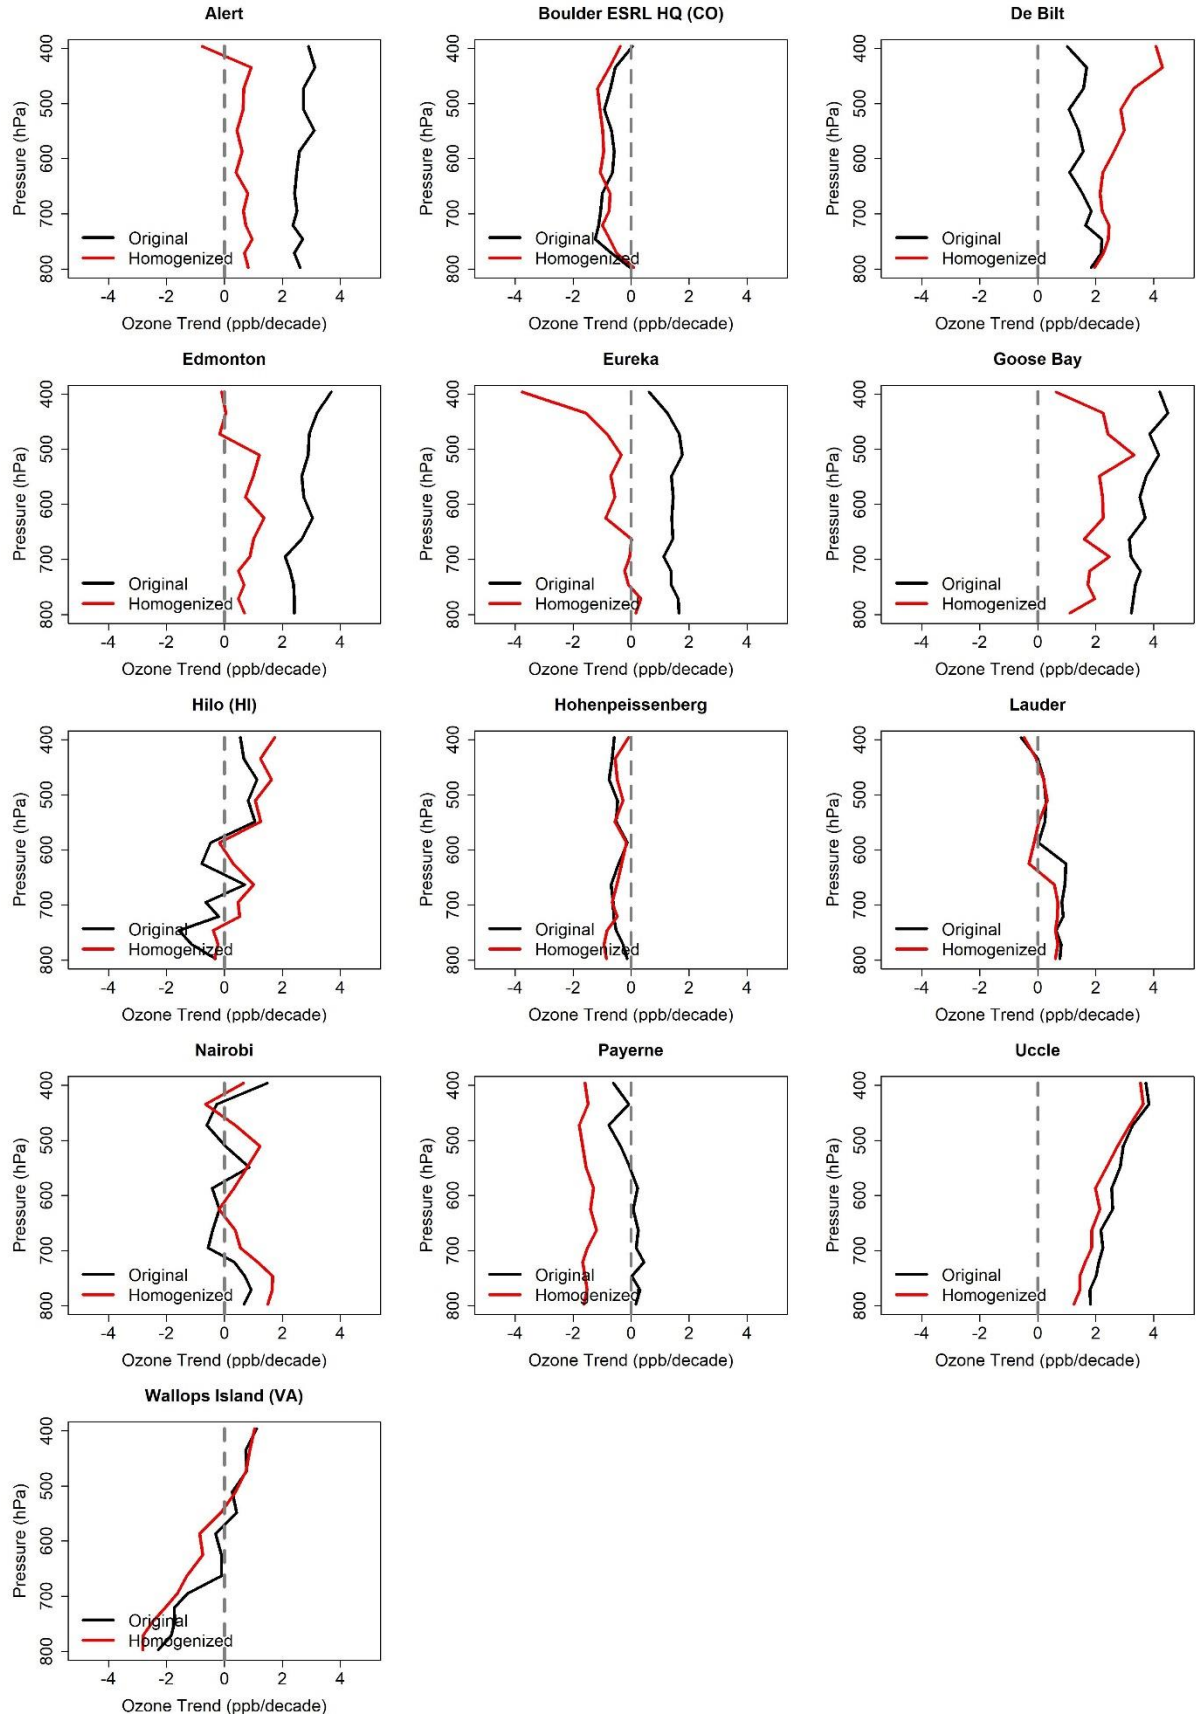

Figure S4. Differences in trends between homogenized (red) and non-homogenized (“Original”, black) data. The impact is to modify the magnitude of trends, but the sign of the trends stays the same at most locations.

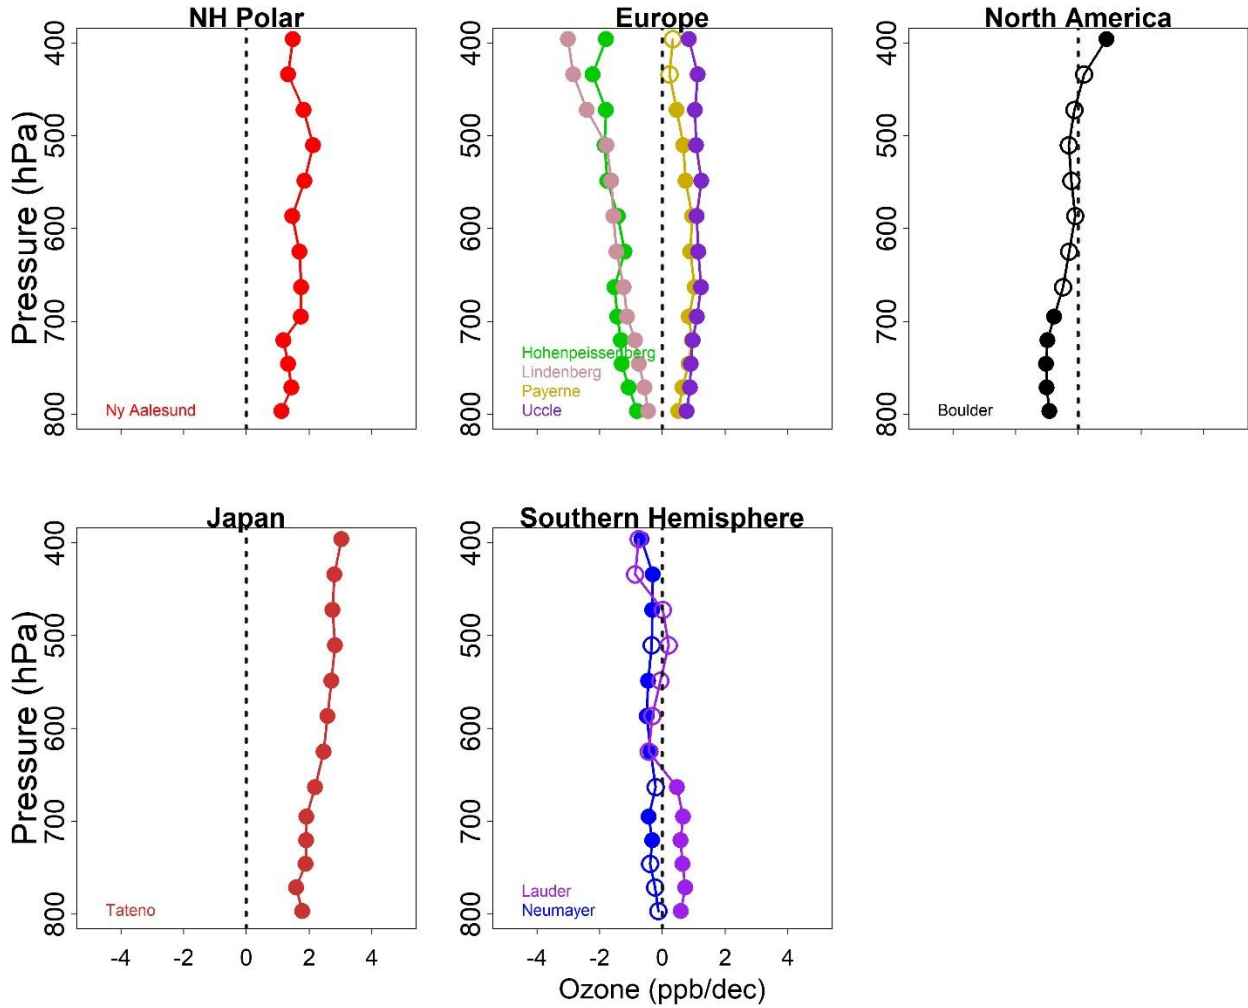

Figure S5. Trends ( $\text{ppb decade}^{-1}$ ) throughout the vertical column (800-400 hPa) at the 9 global ozonesonde sites with data from 1980-2017, divided into five regions. Solid circles indicate that the trends are statistically significant ( $p < 0.1$ ), while open circles are statistically insignificant.

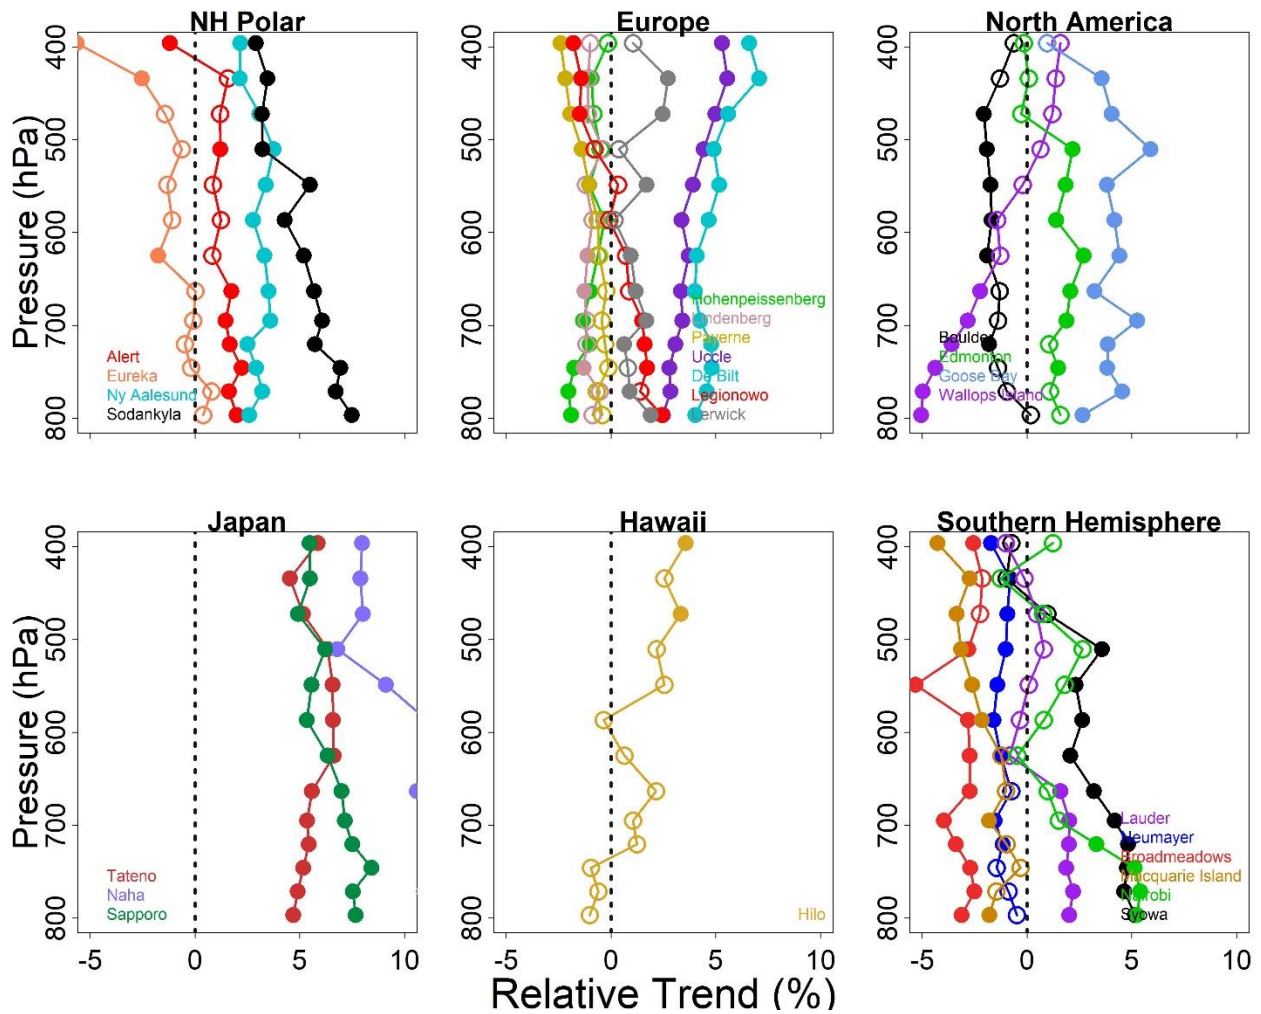

Figure S6. Relative trends ( $\% \text{ decade}^{-1}$ ) throughout the vertical column (800-400 hPa) at the 25 global ozonesonde sites with data from 1990-2017, divided into six regions. Trends are calculated relative to the mean ozone concentration at each pressure level from 1990-2017. Solid circles indicate that the trends are statistically significant ( $p < 0.1$ ), while open circles are statistically insignificant.

### Global NO Emissions from Inventories

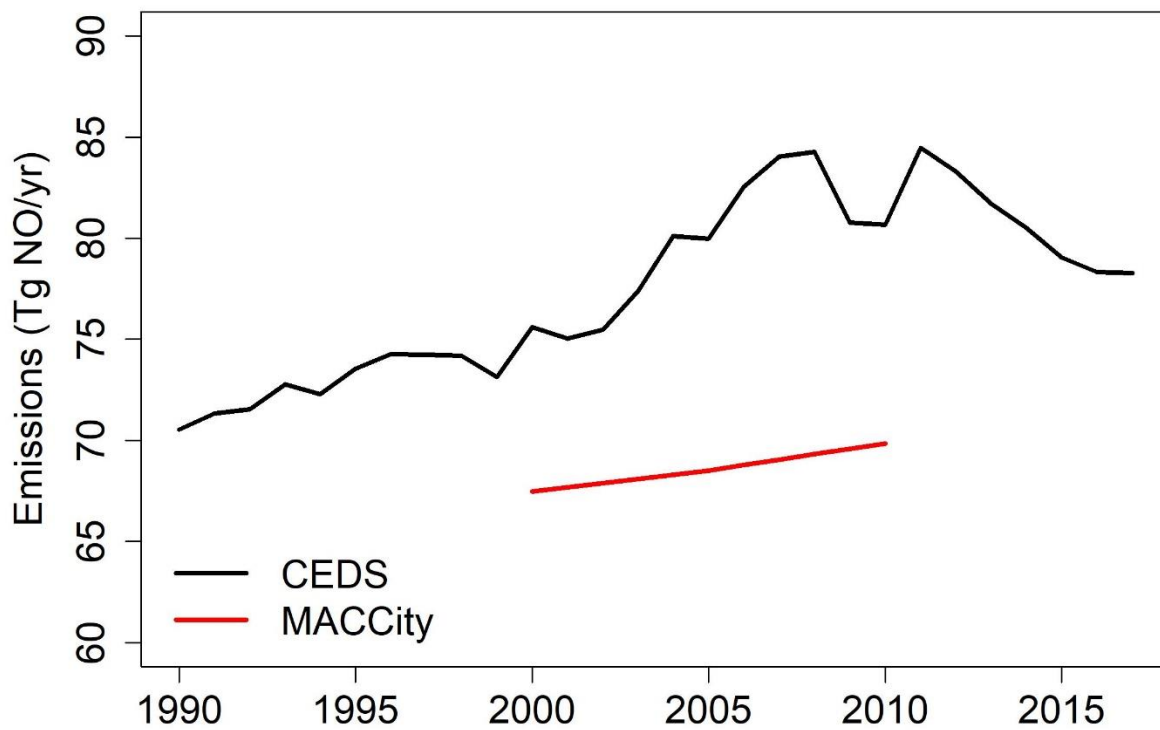

Figure S7. Trends and magnitudes (Tg NO yr<sup>-1</sup>) of NO<sub>x</sub> emissions in the CEDS (black) and MACCity (red) anthropogenic emissions inventories.



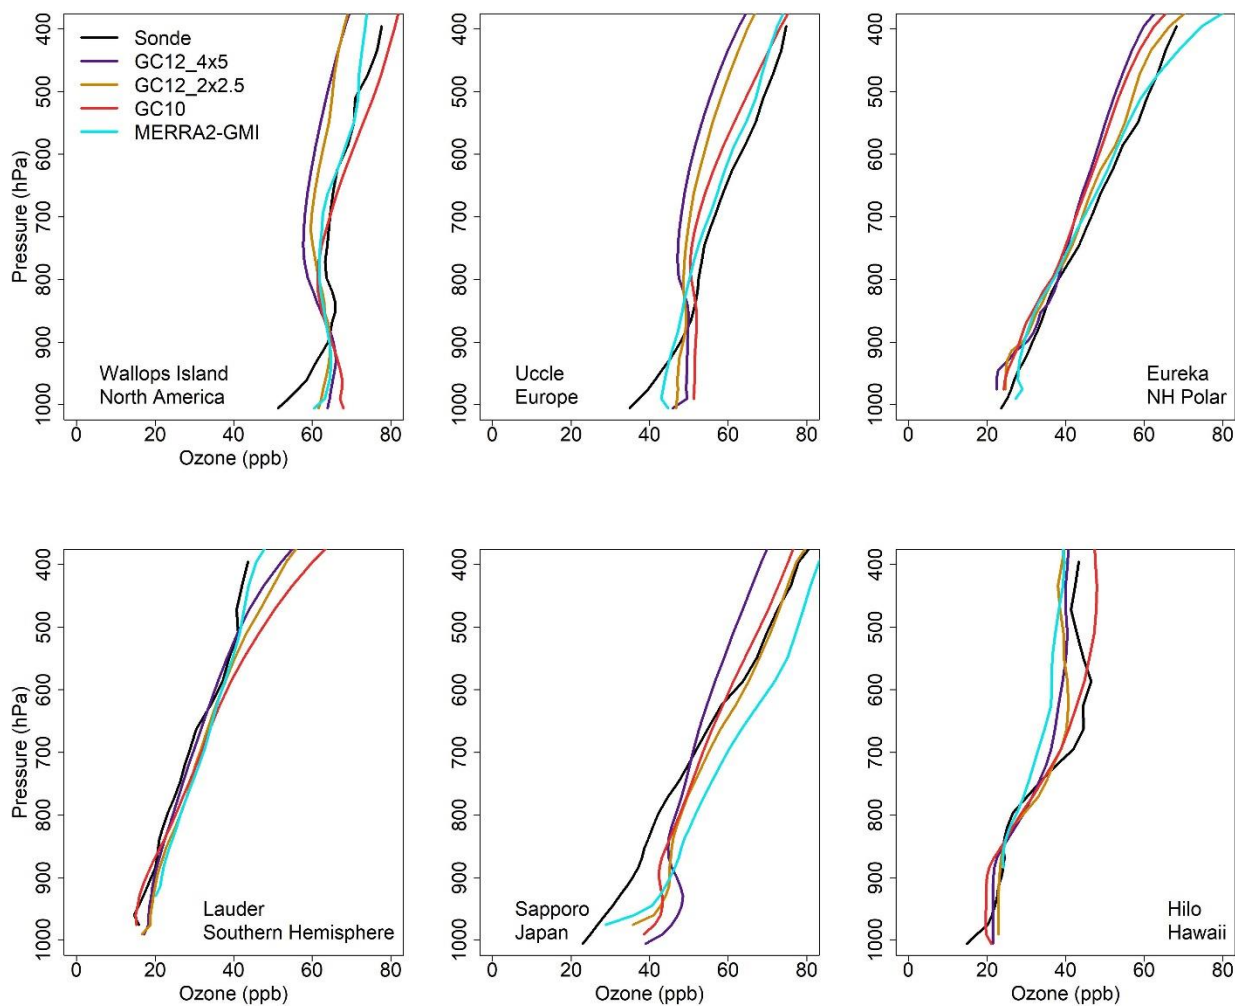

**Figure S8. Vertical profiles of summertime ozone concentrations at ozonesonde launch locations around the globe averaged from 2000-2005. Sondes are shown in black, the earlier version of GEOS-Chem (v10-01) is shown in red, GC 4x5 is shown in purple, and GC 2x2.5 is shown in orange. GC 4x5 refers to the GEOS-Chem v12.9.3 simulations at the 4°x5° horizontal resolution and GC 2x2.5 is the same model at 2°x2.5°. Lauder, a Southern Hemisphere site, is shown during austral summer.**

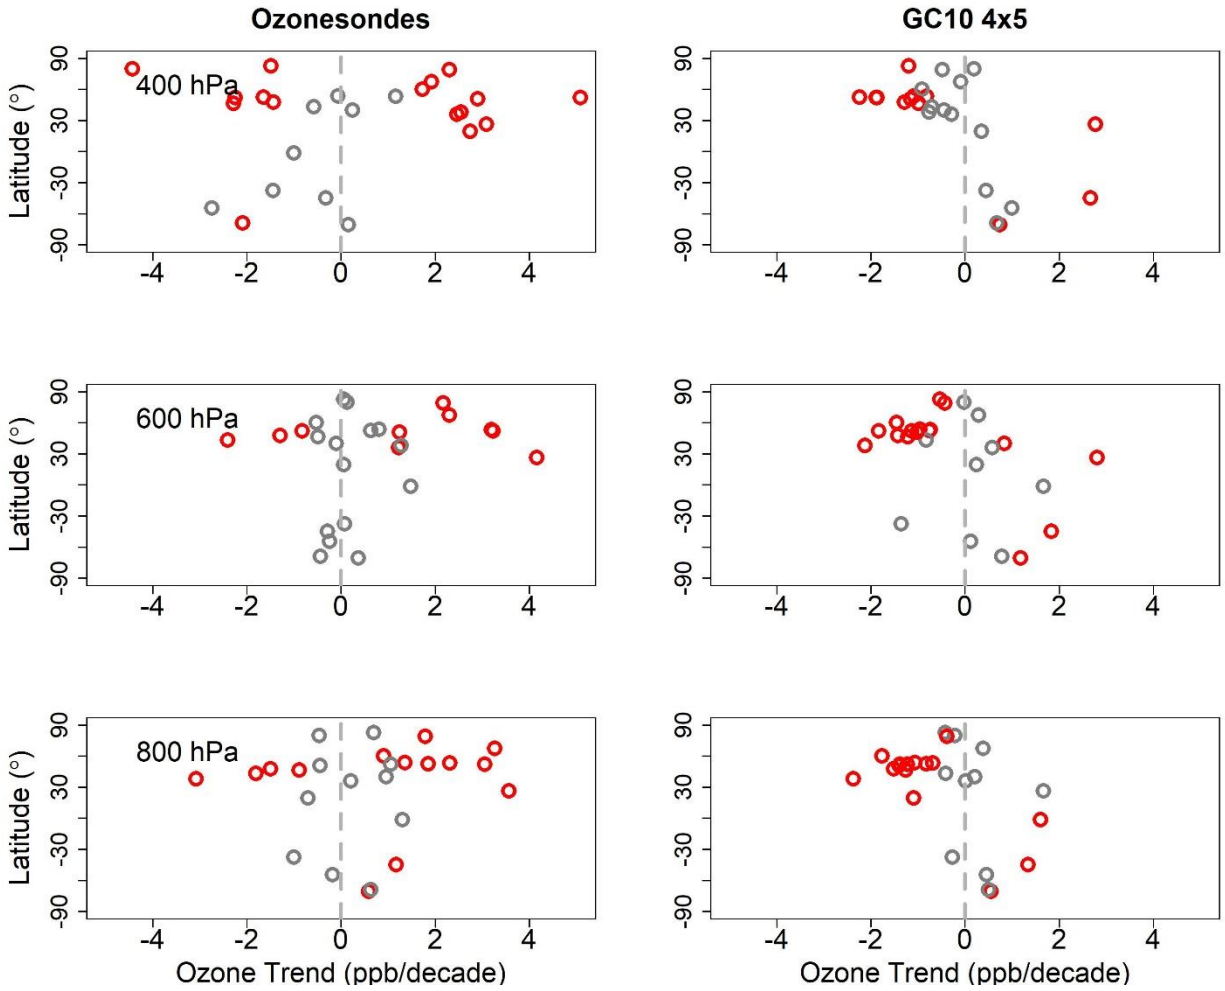

**Figure S9.** Summary of 1990-2010 trends in ozonesondes (left column) and the earlier version of GEOS-Chem (v10-01, right column). GC10 4x5 refers to the earlier simulation at 4°x5° horizontal resolution. The trend in ppb/decade is plotted as a function of ozonesonde launch site latitude. Red circles indicate significant trends ( $p < 0.1$ ), and gray circles indicate insignificant trends.

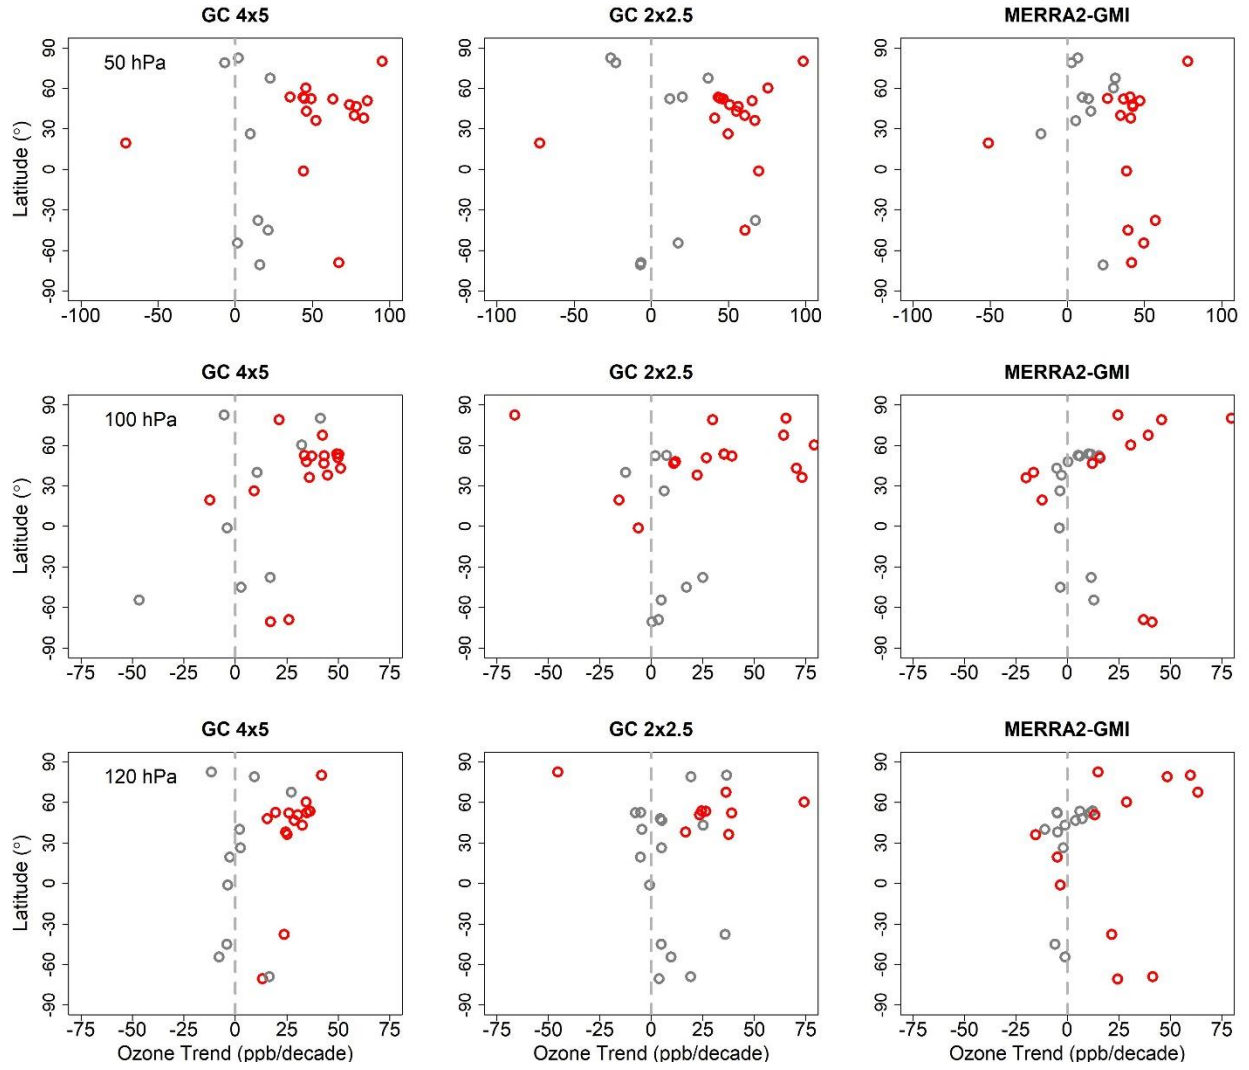

**Figure S10. Stratospheric trends (ppb decade<sup>-1</sup>) in GEOS-Chem and MERRA2-GMI. Trends are plotted as a function of ozonesonde launch latitude.**
